# Supplementary material for: Structure–function relationship in COPD revisited: an in vivo microscopy view
Source: HighWire-hosted journal article supplement (doi:10.1136/thoraxjnl-2013-204479), 2014-01-29
Supplement: thoraxjnl-2013-204479supp.pdf [file thoraxjnl-2013-204479supp.pdf]

## Online supplement

Table S1: Indication for bronchoscopy in the studied cohort

| <b>Group</b>      | <b>Patient N.</b> | <b>Cause of bronchoscopy</b>                                             |
|-------------------|-------------------|--------------------------------------------------------------------------|
| COPD<br>(n=23)    | 1                 | COPD (for participation in the current study)                            |
|                   | 2                 | Subsegmental atelectasis in right lower and middle lobes                 |
|                   | 3                 | Solitary pulmonary nodule in right lower lobe                            |
|                   | 4                 | COPD (for participation in the current study)                            |
|                   | 5                 | COPD (for participation in the current study)                            |
|                   | 6                 | Mass right lower lobe                                                    |
|                   | 7                 | Hemoptysis                                                               |
|                   | 8                 | Solitary pulmonary nodule in right upper lobe                            |
|                   | 9                 | Solitary pulmonary nodule in right upper lobe                            |
|                   | 10                | Hemoptysis                                                               |
|                   | 11                | Follow up after left upper lobectomy                                     |
|                   | 12                | Mass in left upper lobe                                                  |
|                   | 13                | Solitary pulmonary nodule in right upper lobe                            |
|                   | 14                | Hemoptysis                                                               |
|                   | 15                | Pulmonary nodule in right lower lobe                                     |
|                   | 16                | Pulmonary nodules in left upper lobe with a history of oral cancer       |
|                   | 17                | Follow up after left upper lobectomy                                     |
|                   | 18                | In the study of right pleural effusion                                   |
|                   | 19                | Left atelectasis                                                         |
|                   | 20                | Pulmonary nodule in left upper lobe                                      |
|                   | 21                | Left parahilar mass                                                      |
|                   | 22                | Pulmonary infiltrate in HIV patient                                      |
|                   | 23                | Follow up after left upper lobectomy                                     |
| Smokers<br>(n=20) | 1                 | Right atelectasis                                                        |
|                   | 2                 | Follow up post right pneumonectomy                                       |
|                   | 3                 | Pulmonary nodule in left upper lobe                                      |
|                   | 4                 | Hemoptysis                                                               |
|                   | 5                 | Hemoptysis                                                               |
|                   | 6                 | Hemoptysis                                                               |
|                   | 7                 | Pulmonary nodule in left lower lobe with right suprarenal calcified mass |
|                   | 8                 | Pulmonary nodule in left lower lobe                                      |
|                   | 9                 | Hemoptysis                                                               |
|                   | 10                | Hemoptysis                                                               |
|                   | 11                | Hemoptysis                                                               |
|                   | 12                | Hemoptysis                                                               |
|                   | 13                | Pulmonary infiltrates and micronodules in right upper lobe               |

|                      |    |                                                                             |
|----------------------|----|-----------------------------------------------------------------------------|
|                      | 14 | Hemoptysis                                                                  |
|                      | 15 | Pulmonary nodule in right upper lobe                                        |
|                      | 16 | Left atelectasis                                                            |
|                      | 17 | Bilateral upper lobe infiltration                                           |
|                      | 18 | Pulmonary infiltrates in HIV                                                |
|                      | 19 | In the workup of esophageal cancer (with normal lung fields in PET-CT scan) |
|                      | 20 | Left atelectasis                                                            |
| Non-smoker<br>(n=20) | 1  | Multiple pulmonary nodules in middle lobe and right upper lobe              |
|                      | 2  | Mass in the left upper lobe                                                 |
|                      | 3  | Hemoptysis                                                                  |
|                      | 4  | Persistent cough                                                            |
|                      | 5  | Pathological right hilum                                                    |
|                      | 6  | For the study left pleural effusion                                         |
|                      | 7  | Pulmonary nodules in right lower lobe                                       |
|                      | 8  | Hemoptysis                                                                  |
|                      | 9  | Follow up after right upper lobe lobectomy                                  |
|                      | 10 | Laminar atelectasis of the ligula                                           |
|                      | 11 | Hemoptysis                                                                  |
|                      | 12 | Hemoptysis                                                                  |
|                      | 13 | Multiple nodules in right lung (upper and lower lobes)                      |
|                      | 14 | Pulmonary infiltration in right middle lobe and lingula in lymphoma patient |
|                      | 15 | Pulmonary infiltration in previous left carcinoma of the breast             |
|                      | 16 | Follow up after right upper lobe lobectomy                                  |
|                      | 17 | Solitary pulmonary nodule in left lower lobe                                |
|                      | 18 | Follow up after right lower lobe lobectomy                                  |
|                      | 19 | Follow up after electro-cryotherapy for right endobronchial hamartoma       |
|                      | 20 | Follow up after foreign body extraction in left lower lobe                  |

\* FCFM was performed in the non-affected lung.

Table S2: Correlation between the FCFM measurements and the extend of emphysema on CT scan in both the smokers and COPD patients.

|                                 |          | Alveolar diameter | ABI ratio | Extra-alveolar vessel diameter | Alveolar elastic fiber thickness |
|---------------------------------|----------|-------------------|-----------|--------------------------------|----------------------------------|
| Emphysema presence (yes vs. no) | <i>r</i> | 0.245             | 0.156     | 0.030                          | 0.019                            |
|                                 | <i>p</i> | 0.166             | 0.384     | 0.867                          | 0.916                            |
| Visual scoring of emphysema     | <i>r</i> | 0.317             | 0.286     | -0.146                         | 0.019                            |
|                                 | <i>p</i> | 0.073             | 0.111     | 0.41                           | 0.914                            |
| Extent of emphysema (%)         | <i>r</i> | 0.239             | 0.309     | -0.187                         | -0.199                           |
|                                 | <i>p</i> | 0.223             | 0.122     | 0.339                          | 0.309                            |
| Left lung (affection %)         | <i>r</i> | 0.266             | 0.167     | -0.295                         | -0.198                           |
|                                 | <i>p</i> | 0.167             | 0.395     | 0.126                          | 0.304                            |
| Right lung (affection %)        | <i>r</i> | 0.129             | 0.337     | -0.123                         | -0.223                           |
|                                 | <i>p</i> | 0.512             | 0.085     | 0.529                          | 0.256                            |

Table S3 : Correlation between the FCFM measurements and the extend of emphysema on CT scan in COPD patients

|                             |          | Alveolar diameter | ABI ratio    | Extra-alveolar vessel diameter | Alveolar elastic fiber thickness |
|-----------------------------|----------|-------------------|--------------|--------------------------------|----------------------------------|
| Visual scoring of emphysema | <i>r</i> | 0.415             | <b>0.485</b> | -0.148                         | 0.041                            |
|                             | <i>p</i> | 0.07              | <b>0.034</b> | 0.519                          | 0.858                            |
| Extent of emphysema (%)     | <i>r</i> | 0.333             | <b>0.498</b> | -0.338                         | -0.043                           |
|                             | <i>p</i> | 0.17              | <b>0.04</b>  | 0.1637                         | 0.86                             |
| Left lung (affection %)     | <i>r</i> | 0.326             | 0.423        | -0.364                         | -0.033                           |
|                             | <i>p</i> | 0.166             | 0.073        | 0.122                          | 0.89                             |
| Right lung (affection %)    | <i>r</i> | 0.307             | <b>0.553</b> | -0.184                         | -0.06                            |
|                             | <i>p</i> | 0.193             | <b>0.019</b> | 0.435                          | 0.80                             |
